# Supplementary material
Source: publisher figshare collection journal article supplement (https://geolsoc.figshare.com/ndownloader/files/5421677)
Supplement: Supplementary file 1 [file 5421677]

Table S5 Lu-Hf and O isotopic data for the detrital zircons from South Mayo Trough
Sample	172Yb/177Hf	2_	176Lu/177Hf	2_	176Hf/177Hf	2_	U-Pb Age (Ma)	2_	176Hf/177Hfi	2_	_176Hf	2_	Hf Model Age (Ma)	2_	_18O (�)	2_
WPG90/4_1	0.194902	0.009141	0.001759	0.000076	0.281991	0.00004	2072	16							8.34	0.14
WPG90/4_2	0.072848	0.002334	0.000695	0.000018	0.282188	0.000018	1221	28	0.282172	0.000018	5.8	1.3	1654	106	6.18	0.18
WPG90/4_3	0.077132	0.000789	0.000985	0.000007	0.28118	0.000014	2162	17	0.281139	0.000014	-9.3	1.7	3252	160	5.74	0.2
WPG90/4_4	0.079534	0.000448	0.000821	0.000004	0.281137	0.000017	2355	11	0.2811	0.000017	-6.2	1.9	3248	165	5.32	0.19
WPG90/4_5	0.687055	0.019314	0.005173	0.000136	0.288856	0.000267	1035	37							7.13	0.2
WPG90/4_6	0.054203	0.004869	0.000548	0.00005	0.282005	0.000015	Discordant								6.71	0.26
WPG90/4_7	0.092315	0.000459	0.000955	0.000006	0.281241	0.00002	1093	16	0.281221	0.00002	-30.9	1.2	3538	173	4.86	0.26
WPG90/4_8	0.355393	0.017184	0.003299	0.000132	0.282426	0.000165	2587	34							5.84	0.2
WPG90/4_9	0.115082	0.001105	0.001148	0.000008	0.282151	0.000028	2754	10							6.26	0.19
WPG90/4_10	0.092394	0.001203	0.000954	0.00001	0.281018	0.000017	Discordant								5.24	0.25
WPG90/4_11	0.163522	0.004122	0.00146	0.000025	0.28207	0.000029	Discordant								6.73	0.13
WPG90/4_12	0.146543	0.000701	0.001393	0.000004	0.282399	0.000019	Discordant								6	0.25
WPG90/4_13	0.081867	0.00016	0.000852	0.000003	0.282133	0.00002	1416	20	0.28211	0.00002	8	1.4	1693	108	7.77	0.19
WPG90/4_14	0.062248	0.003369	0.000647	0.000034	0.282163	0.000017	1008	23	0.282151	0.000017	0.2	1.1	1783	110	6.37	0.21
WPG90/4_15	0.065067	0.001802	0.000667	0.000016	0.282259	0.000016	1074	16	0.282245	0.000016	5	1.1	1574	97	6.22	0.26
WPG90/4_16	0.07237	0.000979	0.000694	0.000011	0.282356	0.000016	1101	70	0.282341	0.000016	9	1.9	1378	98	6.48	0.23
WPG90/4_17	0.07927	0.000357	0.000845	0.000002	0.282151	0.000015	Discordant								6.97	0.18
WPG90/4_18	0.096312	0.001163	0.001012	0.000012	0.28119	0.000015	2746	25	0.281136	0.000015	4.2	2.2	3015	159	6.23	0.24
WPG90/4_19	0.081188	0.000393	0.000924	0.000005	0.280846	0.000014	3184	10	0.280789	0.000014	2.2	2.4	3502	178	5.14	0.25
WPG90/4_20	0.145878	0.000984	0.001443	0.000009	0.281947	0.000021	1455	24	0.281907	0.000021	1.7	1.4	2067	123	5.17	0.2
WPG90/4_21	0.094088	0.000242	0.000971	0.000002	0.282124	0.000021	1371	21	0.282099	0.000021	6.5	1.4	1734	112	6.06	0.2
WPG90/4_22	0.093317	0.001135	0.000949	0.000011	0.282299	0.000016	1113	34	0.282279	0.000016	7.1	1.3	1492	96	5.86	0.14
WPG90/4_23	0.133308	0.00365	0.001494	0.000038	0.282141	0.000017	Discordant								6.54	0.18
WPG90/4_24	0.116417	0.002052	0.001122	0.000014	0.281378	0.000021	Discordant								5.2	0.18
WPG90/4_25	0.078972	0.000821	0.000857	0.000011	0.280983	0.000018	2722	10	0.280938	0.000018	-3.4	2.1	3407	176	5.8	0.21
WPG90/4_26	0.068423	0.000461	0.00072	0.000004	0.282329	0.000019	1009	43	0.282315	0.000019	6	1.4	1467	99	7.08	0.3
WPG90/4_27	0.107197	0.00074	0.001116	0.000005	0.282197	0.000023	1392	33	0.282168	0.000023	9.5	1.5	1592	111	6.1	0.17
WPG90/4_28	0.152559	0.004934	0.001671	0.000049	0.282027	0.000024	1630	41	0.281976	0.000024	8.1	1.8	1862	125	5	0.21
WPG90/4_29	0.163483	0.001519	0.001789	0.000016	0.281828	0.000018	1637	18	0.281773	0.000019	1.1	1.5	2250	126	5.57	0.17
WPG90/4_30	0.14811	0.002187	0.001584	0.000023	0.282136	0.000018	1292	37	0.282097	0.000018	4.7	1.4	1769	109	4.71	0.27
WPG90/4_31	0.128823	0.001229	0.001236	0.000012	0.28182	0.000016	1341	27	0.281789	0.000016	-5.1	1.3	2342	126	6.65	0.15
WPG90/4_32	0.077906	0.000463	0.000821	0.000004	0.282143	0.000016	1342	22	0.282122	0.000016	6.7	1.3	1701	103	5.17	0.19
WPG90/4_33	0.085392	0.002457	0.000883	0.000025	0.282075	0.000017	1301	45	0.282054	0.000017	3.4	1.5	1849	113	4.46	0.2
WPG90/4_34	0.153639	0.003022	0.001505	0.000028	0.282332	0.000016	1140	17	0.282299	0.000016	8.4	1.1	1443	93	6.2	0.18
WPG90/4_35	0.12266	0.00262	0.001289	0.000025	0.282248	0.000016	1164	42	0.28222	0.000016	6.1	1.4	1586	100	8.32	0.14
WPG90/4_36	0.04797	0.004892	0.000495	0.000054	0.281077	0.000019	2920	12	0.281049	0.000019	5.2	2.3	3112	249	7.19	0.12
WPG90/4_37	0.036654	0.001075	0.000421	0.000011	0.281988	0.000015	1006	30	0.28198	0.000015	-6	1.2	2114	116	5.68	0.14
WPG90/4_38	0.128989	0.002871	0.001477	0.000028	0.281981	0.000022									4.38	0.17
WPG90/4_39	0.08915	0.001831	0.001064	0.000027	0.280681	0.000017	2649	17	0.280627	0.000017	-16.2	2.1	4036	201	6.08	0.16
WPG90/4_40	0.073627	0.004471	0.000813	0.000045	0.2812	0.000017	2757	14	0.281158	0.000017	5.2	2.1	2970	185	5.04	0.11
WPG90/4_41	0.196803	0.00128	0.00199	0.00001	0.282408	0.000016	1072	23	0.282368	0.000016	9.3	1.2	1339	88	5.84	0.13
WPG90/4_42	0.075831	0.000931	0.000752	0.00001	0.28227	0.000019	1068	74	0.282255	0.000019	5.2	2	1558	108	5.69	0.19
WPG90/4_43	0.436233	0.008089	0.003679	0.000068	0.283942	0.000052	Discordant								5.68	0.21
WPG90/4_44	0.102079	0.003206	0.001073	0.000026	0.281191	0.00002	Discordant								6.44	0.16
DL90/7_1	0.118725	0.003478	0.001369	0.000045	0.281811	0.000019	1591	22	0.281769	0.000019	-0.1	1.5	2275	132	8.38	0.18
DL90/7_2	0.061966	0.000716	0.000673	0.000008	0.280915	0.000018	2744	24	0.280879	0.000018	-5	2.2	3511	181	6.91	0.22
DL90/7_3	0.116459	0.00154	0.001197	0.00002	0.282206	0.000026	1240	23	0.282178	0.000026	6.4	1.4	1634	115	6.24	0.19
DL90/7_4	0.182171	0.001454	0.001987	0.000019	0.281944	0.000016	1657	26	0.281881	0.000016	5.4	1.5	2032	115	5.53	0.16
DL90/7_5	0.068383	0.000693	0.000748	0.000006	0.282246	0.000021	1006	35	0.282232	0.000021	3	1.4	1629	108	7.79	0.21
DL90/7_6	0.060626	0.00059	0.000677	0.000007	0.281815	0.000017	1666	19	0.281793	0.000017	2.5	1.5	2199	123	8.67	0.14
DL90/7_7	0.064455	0.000246	0.000676	0.000002	0.282263	0.000016	1062	30	0.282249	0.000016	4.9	1.2	1572	97	8.15	0.12
DL90/7_8	0.180291	0.003525	0.001939	0.000029	0.282433	0.000021	1030	31	0.282395	0.000021	9.3	1.3	1304	95	6.9	0.31
DL90/7_9	0.07456	0.000206	0.000786	0.000003	0.28228	0.000017	1094	34	0.282263	0.000017	6.1	1.3	1531	98	8.47	0.19
DL90/7_10	0.13205	0.000699	0.001392	0.000006	0.282262	0.000016	1081	24	0.282233	0.000016	4.7	1.2	1594	98	7.79	0.25
DL90/7_11	0.059936	0.00088	0.000662	0.000008	0.282108	0.000016	1359	40	0.282091	0.000016	6	1.5	1752	107	7.57	0.17
DL90/7_12	0.094768	0.002501	0.00096	0.000027	0.282379	0.000021	1076	41	0.28236	0.000021	9.1	1.5	1353	99	7.16	0.24
DL90/7_13	0.06488	0.000426	0.00077	0.000006	0.282198	0.000021	1396	48	0.282177	0.000021	9.9	1.7	1572	109	6.27	0.24
DL90/7_14	0.082478	0.00067	0.000912	0.000005	0.282225	0.000016	1135	31	0.282205	0.000016	5	1.3	1626	99	9.32	0.21
DL90/7_15	0.115151	0.000893	0.001217	0.000007	0.282241	0.000017	1174	24	0.282214	0.000017	6.2	1.2	1593	99	6.32	0.2
DL90/7_16	0.137103	0.000773	0.001537	0.000006	0.281859	0.000018	1595	41	0.281813	0.000018	1.5	1.6	2190	125	6.17	0.13
DL90/7_17	0.043395	0.000396	0.000521	0.000007	0.28114	0.000015	2660	19	0.281114	0.000015	1.4	2.1	3096	162	6.46	0.23
DL90/7_18	0.059032	0.001552	0.000627	0.000015	0.281644	0.000015	1413	29	0.281628	0.000015	-9.2	1.4	2623	137	6.62	0.22
DL90/7_19	0.224156	0.001726	0.002557	0.000016	0.281914	0.000015	1599	20	0.281837	0.000015	2.5	1.4	2141	117	9.25	0.28
DL90/7_20	0.08142	0.002152	0.000904	0.000023	0.282167	0.000015	1084	25	0.282148	0.000015	1.8	1.2	1757	103	7.63	0.18
DL90/7_21	0.136413	0.001495	0.001528	0.000015	0.282195	0.000017	1373	22	0.282156	0.000017	8.6	1.3	1623	101	7.4	0.19
DL90/7_22	0.067732	0.000324	0.00075	0.000002	0.282208	0.000017	1066	57	0.282193	0.000017	2.9	1.7	1679	107	6.52	0.23
DL90/7_23	0.087524	0.001058	0.000982	0.000009	0.282217	0.000015	1197	41	0.282195	0.000015	6	1.4	1621	100	8.94	0.38
IT/5_1	0.069405	0.000588	0.000718	0.000007	0.282249	0.000013	1121	35	0.282234	0.000013	5.7	1.3	1577	94	7.34	0.17
IT/5_2	0.185018	0.001677	0.001739	0.000023	0.282746	0.000025	1079	45							5.86	0.12
IT/5_3	0.084937	0.001902	0.000886	0.000019	0.282269	0.000018	520	41	0.28226	0.000018	-7	1.2	1775	108	6.64	0.27
IT/5_4	0.141895	0.001041	0.001463	0.000009	0.282333	0.000015	1090	30	0.282302	0.000015	7.4	1.2	1457	91	7.29	0.1
IT/5_5	0.117496	0.001489	0.001216	0.000015	0.282372	0.000015	1069	28	0.282347	0.000015	8.5	1.2	1380	89	8.01	0.25
IT/5_6	0.125357	0.001212	0.001336	0.00001	0.282074	0.000014	1346	36	0.28204	0.000014	3.9	1.4	1857	107	7.17	0.28
IT/5_7	0.125545	0.000345	0.001315	0.000005	0.282356	0.000015	1127	48	0.282328	0.000015	9.1	1.5	1393	92	7.64	0.27
IT/5_8	0.122531	0.001384	0.001338	0.000016	0.282026	0.000026	1488	29	0.281989	0.000026	5.3	1.6	1896	126	6.58	0.2
IT/5_9	0.592142	0.064763	0.004962	0.000536	0.281225	0.000041	2893	13	0.28095	0.000051	1	2.8	3302	230	6.37	0.26
IT/5_10	0.117956	0.004178	0.001204	0.000039	0.281464	0.000017	1971	17	0.281419	0.000017	-3.8	1.6	2793	152	6.98	0.24
IT/5_11	0.037984	0.001437	0.000362	0.000012	0.28147	0.000017	1856	19	0.281457	0.000017	-5.1	1.6	2768	151	7.62	0.19
IT/5_12	0.455328	0.013911	0.003736	0.000114	0.282757	0.000082	2668	13							6.73	0.17
IT/5_13	0.265036	0.004367	0.002474	0.000035	0.282038	0.000023	2701	13							6.77	0.22
IT/5_14	0.096443	0.000203	0.001021	0.000001	0.282018	0.000014	1451	13	0.281989	0.000014	4.5	1.3	1910	107	5.54	0.29
IT/5_15	0.117224	0.000807	0.001214	0.000008	0.282206	0.000018	1147	18	0.28218	0.000018	4.3	1.2	1670	103	6.69	0.16
IT/5_16	0.080414	0.00116	0.000838	0.000012	0.282358	0.000018	1061	23	0.282341	0.000018	8.1	1.2	1394	94	7.86	0.14
IT/5_17	0.62648	0.024254	0.005052	0.000175	0.283127	0.000089	1652	21							8.15	0.22
IT/5_18	0.196486	0.00806	0.001968	0.000084	0.282038	0.000022	1842	15							5.46	0.19
IT/5_19	1.065954	0.031158	0.008762	0.000245	0.283711	0.000087	1096	20							8.33	0.23
IT/5_20	0.119709	0.000179	0.00126	0.000003	0.282334	0.000015	498	38	0.282322	0.000015	-5.3	1.1	1664	98	6.93	0.27
IT/5_21	0.165544	0.001175	0.001699	0.000015	0.282418	0.000017	2665	10							8.74	0.21
IT/5_22	0.209186	0.015777	0.002217	0.000127	0.281138	0.000021	1215	26	0.281087	0.000021	-32.9	1.3	3744	188	6.39	0.25
IT/5_23	0.095894	0.000725	0.001067	0.000005	0.282247	0.000013	2656	13							9.75	0.21
IT/5_24	0.046781	0.000643	0.000504	0.000007	0.281062	0.000013	1057	34	0.281052	0.000013	-37.7	1.2	3878	177	6.52	0.23
IT/5_25	0.087738	0.004354	0.000821	0.00004	0.282307	0.000018	1488	15							7.45	0.29
IT/5_26	0.245386	0.006937	0.002327	0.000056	0.282318	0.000023	1623	21							10	0.21
IT/5_27	0.234914	0.0059	0.002524	0.000054	0.28215	0.000025	2711	13							5.91	0.28
IT/5_28	0.255554	0.011058	0.002027	0.000057	0.282627	0.000085	1056	31							6.52	0.3
IT/5_29	0.079594	0.003334	0.000826	0.00003	0.28222	0.000017	1054	26	0.282204	0.000017	3.1	1.2	1663	104	7.8	0.11
IT/12_1	0.046078	0.000586	0.00047	0.000007	0.28219	0.000022	1011	54	0.282181	0.000022	1.3	1.7	1724	116	6.75	0.14
IT/12_2	0.10876	0.001944	0.001277	0.000022	0.282114	0.000017	460	6	0.282103	0.000017	-13.9	0.8	2102	115	6.65	0.23
IT/12_3	0.186538	0.006445	0.001931	0.000054	0.282078	0.000024	1279	18	0.282032	0.000024	2.1	1.4	1900	122	5.24	0.17
IT/12_4	0.238834	0.002028	0.002658	0.000026	0.282017	0.000014	Discordant								8.67	0.18
IT/12_5	0.166267	0.001366	0.001951	0.000013	0.28215	0.00002	463	5	0.282133	0.00002	-12.8	0.9	2043	118	6.08	0.19
IT/12_6	0.09482	0.001286	0.0011	0.000012	0.28206	0.000016	450	4	0.282051	0.000016	-16	0.8	2207	117	6.18	0.19
IT/12_7	0.157778	0.000894	0.001764	0.000009	0.282123	0.000018	456	5	0.282108	0.000018	-13.8	0.8	2094	116	6.2	0.23
IT/12_8	0.144316	0.004552	0.001662	0.000049	0.282131	0.000018	462	6	0.282116	0.000018	-13.4	0.8	2076	115	6.38	0.23
IT/12_9	0.105101	0.002804	0.001214	0.000027	0.282076	0.000016	451	5	0.282066	0.000016	-15.4	0.8	2176	116	5.94	0.13
IT/12_10	0.077181	0.00137	0.000932	0.000018	0.282069	0.000015	465	6	0.282061	0.000015	-15.3	0.7	2182	114	5.93	0.2
IT/12_11	0.15168	0.003973	0.001635	0.000039	0.282169	0.000019	454	7	0.282155	0.000019	-12.2	0.9	2004	115	6.16	0.2
IT/12_12	0.085828	0.002282	0.001011	0.000025	0.282095	0.000019	483	7	0.282086	0.000019	-14	0.9	2125	119	6.08	0.2
IT/12_13	0.093974	0.007176	0.000999	0.000058	0.282094	0.00002	469	8	0.282085	0.00002	-14.3	0.9	2133	122	6.24	0.15
IT/12_14	0.098834	0.002888	0.001165	0.000039	0.282067	0.000016	484	6	0.282056	0.000016	-15	0.8	2182	116	6	0.15
IT/17_1	0.131446	0.004902	0.001444	0.000053	0.282133	0.000018	487	6	0.28212	0.000018	-12.7	0.8	2058	115	7.02	0.24
IT/17_2	0.077508	0.001819	0.000891	0.000022	0.282063	0.000015	490	8	0.282055	0.000015	-14.9	0.8	2182	114	7.03	0.22
IT/17_3			no data				459	7							6.84	0.23
IT/17_4	0.096913	0.0012	0.001093	0.000014	0.282092	0.000018	485	7	0.282082	0.000018	-14.1	0.8	2132	117	6.68	0.18
IT/17_5	0.092431	0.001776	0.001063	0.00002	0.28215	0.000025	483	6	0.28214	0.000025	-12	1	2021	125	6.62	0.17
IT/17_6	0.121594	0.004858	0.001328	0.000053	0.282136	0.00002	483	6	0.282124	0.00002	-12.6	0.9	2052	119	6.58	0.21
IT/17_7	0.124689	0.001069	0.001378	0.000009	0.282125	0.000017	512	8	0.282111	0.000017	-12.4	0.8	2065	113	6.72	0.18
IT/17_8	0.103515	0.000907	0.001176	0.000009	0.282137	0.000016	526	10	0.282125	0.000016	-11.6	0.8	2032	111	6.61	0.2
IT/17_9	0.061347	0.000735	0.000722	0.000008	0.282075	0.000013	510	7	0.282068	0.000013	-14	0.7	2148	111	6.79	0.2
IT/17_10	0.09364	0.001245	0.001062	0.000013	0.282049	0.000015	503	9	0.282039	0.000015	-15.2	0.8	2207	115	6.49	0.26
IT/17_11	0.096278	0.001176	0.001079	0.000011	0.282113	0.000015	498	7	0.282103	0.000015	-13.1	0.8	2087	112	6.78	0.31
IT/17_12	0.115304	0.001965	0.001363	0.00002	0.28209	0.000017	500	7	0.282078	0.000017	-13.9	0.8	2134	116	7.09	0.17
IT/17_13	0.06532	0.001076	0.000764	0.000013	0.282094	0.000015	481	8	0.282088	0.000015	-14	0.8	2123	112	7	0.19
IT/17_14	0.107003	0.001482	0.001235	0.000014	0.282102	0.000015	500	6	0.28209	0.000015	-13.4	0.8	2110	112	6.76	0.23
IT/17_15	0.076677	0.000938	0.000909	0.00001	0.282094	0.000015	504	7	0.282086	0.000015	-13.5	0.8	2117	112	6.88	0.13
IT/17_16	0.110174	0.00036	0.001311	0.000006	0.282115	0.000021	491	6	0.282103	0.000021	-13.2	0.9	2089	121	7.1	0.28
IT/17_17	0.15881	0.003239	0.001734	0.000033	0.28209	0.000015	525	9	0.282073	0.000015	-13.5	0.8	2133	114	6.67	0.3
IT/17_18	0.129644	0.000497	0.00146	0.000006	0.282111	0.000014	487	6	0.282098	0.000014	-13.5	0.7	2101	110	7.07	0.25
IT/17_19	0.143643	0.001913	0.001618	0.000018	0.282173	0.000021	492	9	0.282158	0.000021	-11.2	0.9	1983	117	6.97	0.19
IT/17_20	0.08883	0.001104	0.000971	0.00001	0.282025	0.000019	1378	68	0.281999	0.000019	3.2	2	1921	121	6.65	0.22
IT/17_21	0.144305	0.00405	0.001607	0.000044	0.282157	0.000016	513	7	0.282142	0.000016	-11.3	0.8	2006	110	6.69	0.21
IT/17_22	0.120837	0.000838	0.001356	0.000011	0.282108	0.000016	504	6	0.282095	0.000016	-13.2	0.8	2099	112	6.59	0.19
IT/17_23	0.026902	0.000461	0.000316	0.000004	0.281059	0.000015	2779	16	0.281042	0.000015	1.6	2.1	3185	167	5.11	0.24
IT/17_24	0.088001	0.000465	0.000992	0.000005	0.282109	0.000017	485	8	0.2821	0.000017	-13.4	0.8	2097	114	6.36	0.23
IT/17_25	0.099279	0.001463	0.001063	0.000015	0.28211	0.000015	510	8	0.2821	0.000015	-12.9	0.8	2087	111	6.6	0.23
IT/17_26	0.086412	0.000814	0.00097	0.000006	0.28211	0.000014									6.39	0.25
IT/17_27	0.105435	0.000446	0.001208	0.000007	0.282108	0.000014	510	7	0.282096	0.000014	-13	0.8	2095	110	6.63	0.17
IT/18_1	0.075771	0.000185	0.000874	0.000001	0.282092	0.000015	Discordant								6.73	0.14
IT/18_2	0.106452	0.002032	0.001167	0.000021	0.28218	0.000018	474	6	0.282169	0.000018	-11.2	0.8	1969	112	6.9	0.13
IT/18_3	0.116322	0.001728	0.001398	0.000034	0.282086	0.000016	496	7	0.282073	0.000016	-14.1	0.8	2145	115	6.7	0.14
IT/18_4	0.076351	0.00213	0.000877	0.000024	0.281316	0.000015	2600	12	0.281272	0.000015	5.6	2	2815	155	5.11	0.15
IT/18_5	0.069218	0.000554	0.000816	0.000006	0.282044	0.000016	517	7	0.282036	0.000016	-15	0.8	2208	117	6.66	0.15
IT/18_6	0.092069	0.000836	0.001043	0.00001	0.282103	0.000017	526	9	0.282093	0.000017	-12.8	0.8	2094	114	6.48	0.18
IT/18_7	0.113365	0.001469	0.001329	0.000017	0.282101	0.000017	526	7	0.282088	0.000017	-12.9	0.8	2103	114	6.63	0.15
IT/18_8	0.065441	0.001318	0.000796	0.000016	0.282084	0.000019	500	7	0.282077	0.000019	-13.9	0.9	2136	119	6.71	0.2
IT/18_9	0.086529	0.000873	0.001037	0.000008	0.28207	0.000018	519	7	0.28206	0.000018	-14.1	0.8	2161	118	6.67	0.17
IT/18_10	0.094549	0.001632	0.001051	0.000018	0.281985	0.000017	1162	51	0.281962	0.000017	-3	1.6	2082	121	7.16	0.1
IT/18_11	0.122357	0.00176	0.001445	0.00003	0.282089	0.000017	489	6	0.282075	0.000017	-14.2	0.8	2143	117	6.36	0.19
IT/18_12	0.105098	0.00184	0.001243	0.00002	0.282155	0.000018	483	6	0.282144	0.000018	-11.9	0.8	2015	113	6.87	0.17
IT/18_13	0.105559	0.005146	0.001166	0.000061	0.282134	0.000018	465	8	0.282124	0.000018	-13	0.8	2059	115	6.69	0.2
IT/18_14	0.075073	0.001027	0.000901	0.000014	0.282078	0.000018	480	17	0.28207	0.000018	-14.6	0.9	2157	118	6.33	0.14
IT/18_15	0.063318	0.001634	0.000792	0.000019	0.282062	0.000016	466	6	0.282056	0.000016	-15.4	0.8	2191	116	6.36	0.09
IT/18_16	0.16378	0.008812	0.001741	0.000086	0.28216	0.000026	459	7	0.282145	0.000026	-12.4	1.1	2022	128	6.39	0.18
IT/18_17	0.109589	0.001885	0.001348	0.000025	0.282099	0.000017	487	7	0.282087	0.000017	-13.9	0.8	2122	115	6.02	0.19
IT/18_18	0.083304	0.002377	0.000991	0.000025	0.282068	0.000018	484	8	0.282059	0.000018	-14.9	0.8	2178	119	6.31	0.18
IT/18_19	0.088988	0.001263	0.00107	0.000016	0.2821	0.000016	482	7	0.28209	0.000016	-13.9	0.8	2118	113	6.48	0.17
IT/18_20	0.094452	0.000595	0.0012	0.000009	0.282138	0.00002	475	7	0.282127	0.00002	-12.7	0.9	2049	118	6.43	0.26
IT/18_21	0.148015	0.001951	0.001731	0.00002	0.282138	0.000024	491	7	0.282122	0.000024	-12.5	1	2052	125	6.35	0.24
IT/18_22	0.068756	0.003662	0.000871	0.000049	0.282111	0.000022	489	7	0.282103	0.000022	-13.2	1	2090	124	5.89	0.19
IT/18_23	0.057952	0.000813	0.000667	0.000009	0.282036	0.000016	477	9	0.28203	0.000016	-16.1	0.8	2236	118	6.45	0.2
IT/18_24	0.114562	0.005222	0.001326	0.000061	0.282136	0.000018	485	8	0.282124	0.000018	-12.6	0.9	2051	116	6.39	0.25
We used our measured 176Lu/177Hf and 176Hf/177Hf ratios to calculate e176Hfi values, which express the deviation of a rocks 176Hf/177Hf ratio from the bulk Earth in parts per 10,000, as recorded at the time of zircon crystalisation.
These calculations assumed the modern chondritic values of Bouvier et al. (2008) for 176Lu/177HfCHUR = 0.0336, and 176Hf/177Hf CHUR = 0.282785, and the terrestrial 176Lu decay constant of 1.867x10-11 a-1 (Scherer et al., 2001).
Hf Model ages are calculated using a constant average crustal 176Lu/177Hf value of 0.0115
Bouvier, A., Vervoort, J.D. & Patchett, P.J. 2008. The Lu�Hf and Sm�Nd isotopic composition of CHUr: constraints from unequilibrated chondrites and implications for the bulk composition of terrestrial planets. Earth and Planetary Science Letters, 273, 48�57.
Scherer, E.E., M�nker, C. & Mezger, K. 2001. Calibration of the lutetium�hafnium clock. Science, 293, 683�687.
